# Supplementary material for: Pyridine-based functionalized graphene oxides as a new class of corrosion inhibitors for mild steel: an experimental and DFT approach
Source: Royal Society of Chemistry journal article supplement (doi:10.1039/c7ra05825j), 2017-01-01
Supplement: c7ra05825j1.pdf [file c7ra05825j1.pdf]

## Supporting Informations

### Pyridine based functionalized graphene oxides as new class of corrosion inhibitors for mild steel: Experimental and DFT approach

Rajeev Kumar Gupta, Manisha Malviya, Neeraj Gupta, Chandrabhan Verma and M.A. Quraishi

*Department of Chemistry, Indian Institute of Technology, Banaras Hindu University, Varanasi  
221005, India.*

*E-mail: [maquraishi.apc@itbhu.ac.in](mailto:maquraishi.apc@itbhu.ac.in)*

*Fax: +91-542-2368428; Tel: +91-9307025126*

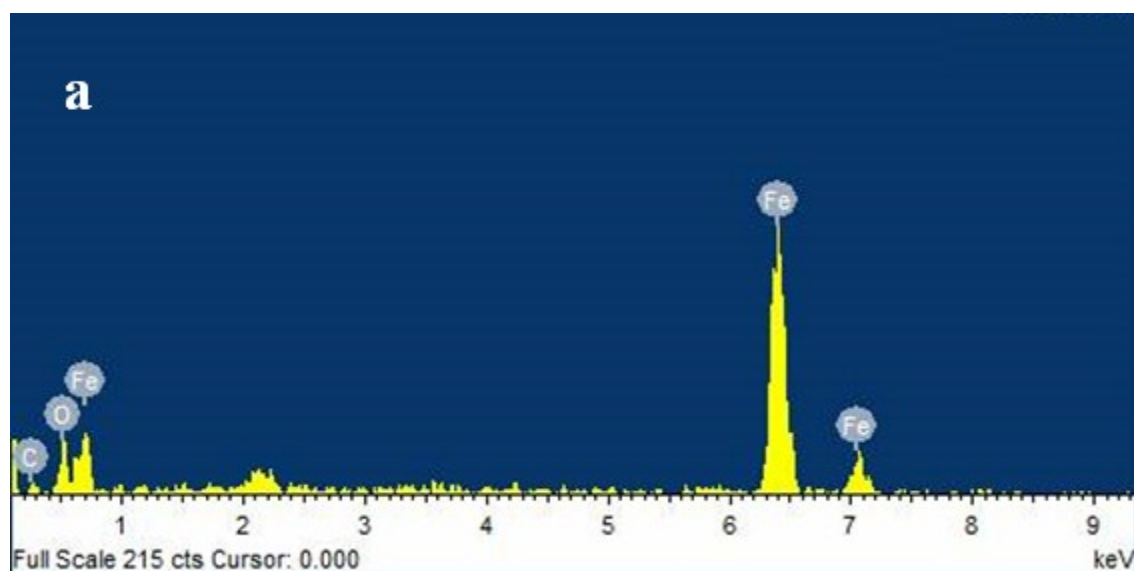

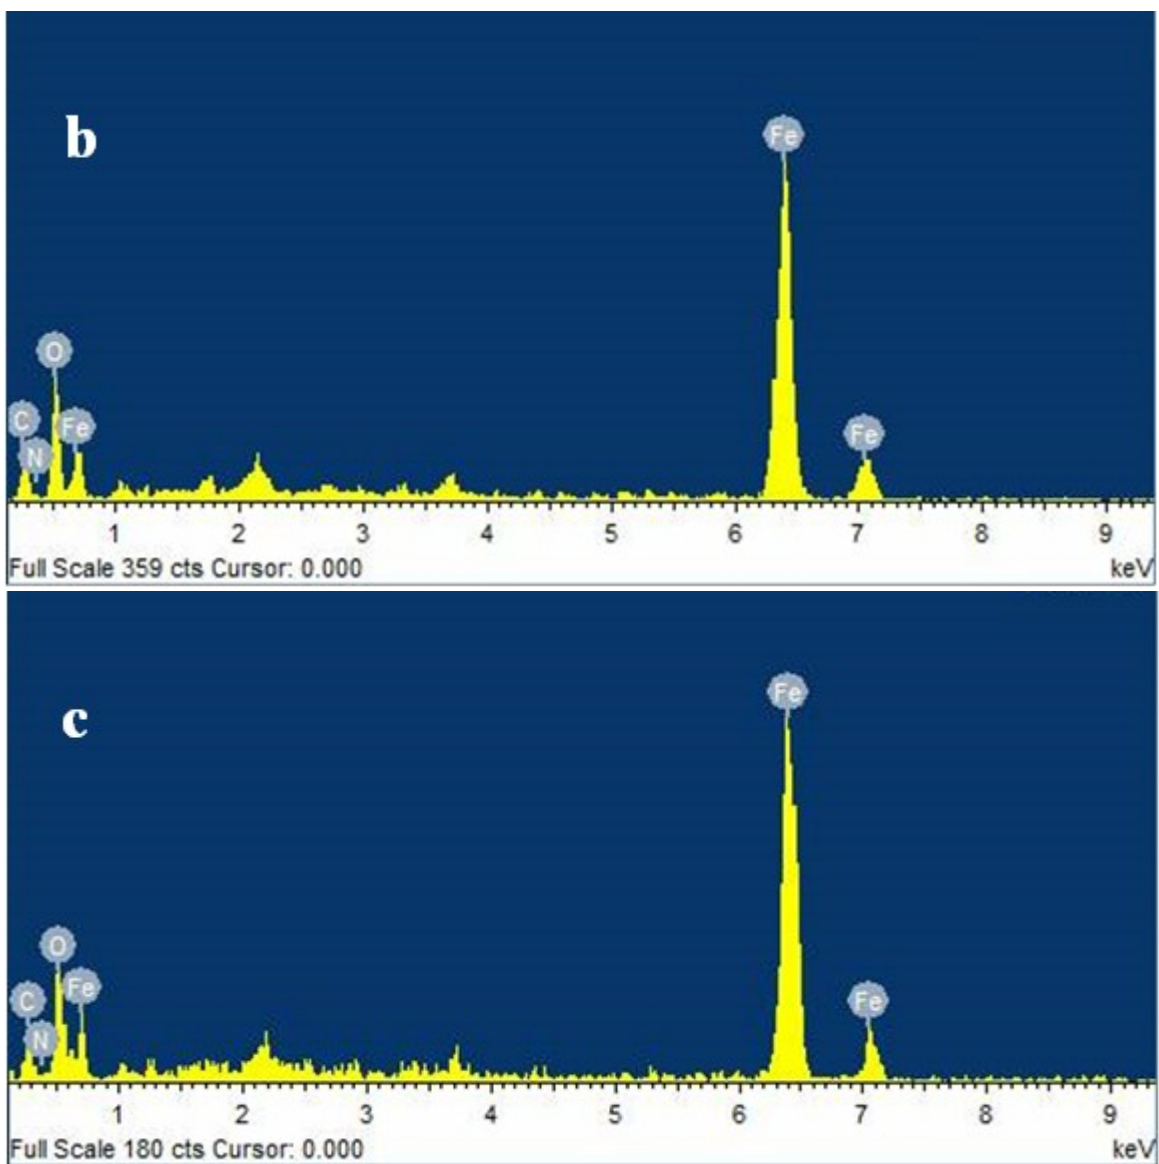

**Fig. S1:** EDX spectra of mild steel surface in the absence (a) and presence of optimum concentration of DAMP-GO (b), and DAZP-GO composites (c).
